# Supplementary material for: Health Technology Reassessment: Addressing Uncertainty in Economic Evaluations of Oncology Drugs at Time of Reimbursement Using Long-Term Clinical Trial Data
Source: MDPI journal article supplement (doi:10.3390/curroncol30070484), 2023-07-10
Supplement: s1 [file s1]

## Supplementary Materials

**Table S1.** Model input parameter values

| Input parameter                                  | Base case value   | Source                        |
|--------------------------------------------------|-------------------|-------------------------------|
| <i>Modeling approach</i>                         |                   |                               |
| Discount Factor (costs)                          | 3%                | I.C.E.R.                      |
| Discount Factor (outcomes)                       | 3%                | guidelines                    |
| Starting age of cohort (years)                   | 63                | Robert 2015                   |
| Average body weight (kg), pembrolizumab          | 112.0             | Wang 2017                     |
| Average body weight (kg), ipilimumab             | 98.7              | Wang 2017                     |
| Time Horizon (months)                            | 240               | Wang 2017                     |
| <i>Fitted parametric curve selections</i>        |                   |                               |
| Pembrolizumab PFS                                | Log-logistic      | Calculated                    |
| Pembrolizumab OS                                 | Log-normal        | Calculated                    |
| Ipilimumab PFS                                   | Loglogistic       | Calculated                    |
| Ipilimumab OS                                    | Log-normal        | Calculated                    |
| <i>Unit costs</i>                                |                   |                               |
| Pembrolizumab (per mg)                           | \$55.42           | CMS 2023                      |
| Ipilimumab (per mg)                              | \$165.45          | CMS 2023                      |
| Chair time unit cost                             | \$144.39          | CMS 2023                      |
| Pre-progression patient management (monthly)     | \$873.37          | Tarhini 2015,<br>CPI-adjusted |
| Post-progression patient management (monthly)    | \$2,722.63        | Tarhini 2015,<br>CPI-adjusted |
| End of life costs                                | \$6,484.45        | Tarhini 2015,<br>CPI-adjusted |
| <i>Adverse event management costs (grade 3+)</i> |                   |                               |
| Fatigue                                          | \$4,350.38        | CMS 2023                      |
| Diarrhea                                         | \$7,159.38        | CMS 2023                      |
| Rash                                             | \$4,350.38        | CMS 2023                      |
| Pruritus                                         | \$4,350.38        | CMS 2023                      |
| Nausea                                           | \$7,159.38        | CMS 2023                      |
| Asthenia                                         | \$0.00            | Assumption                    |
| Arthralgia                                       | \$4,350.38        | CMS 2023                      |
| Vitiligo                                         | \$0.00            | Assumption                    |
| Colitis                                          | \$7,159.38        | CMS 2023                      |
| Hepatitis                                        | \$4,350.38        | CMS 2023                      |
| Hypophysitis                                     | \$7,159.38        | CMS 2023                      |
| Pneumonitis                                      | \$4,350.38        | CMS 2023                      |
| <i>Adverse event rates</i>                       |                   |                               |
|                                                  | Pembrolizumab arm | Ipilimumab arm                |
| Fatigue                                          | 0.4%              | 1.2%                          |
|                                                  |                   | Robert 2015                   |

|              |      |      |             |
|--------------|------|------|-------------|
| Diarrhea     | 1.1% | 3.1% | Robert 2015 |
| Rash         | 0.0% | 0.8% | Robert 2015 |
| Pruritus     | 0.0% | 0.4% | Robert 2015 |
| Nausea       | 0.0% | 0.8% | Robert 2015 |
| Asthenia     | 0.4% | 0.4% | Robert 2015 |
| Arthralgia   | 0.4% | 0.8% | Robert 2015 |
| Vitiligo     | 0.0% | 0.0% | Robert 2015 |
| Colitis      | 2.5% | 7.0% | Robert 2015 |
| Hepatitis    | 1.8% | 0.4% | Robert 2015 |
| Hypophysitis | 0.4% | 1.6% | Robert 2015 |
| Pneumonitis  | 0.4% | 0.4% | Robert 2015 |

*Utility values*

|                               |      |           |
|-------------------------------|------|-----------|
| Progression-free health state | 0.83 | Wang 2017 |
| Post-progression health state | 0.78 | Wang 2017 |

Abbreviations: CMS, Centers for Medicare and Medicaid Services; CPI, consumer price index; I.C.E.R., Institute for Clinical and Economic Review; kg, kilogram; mg, milligram

**Table S2.** Scenario analyses

A – Scenario analyses based on interim data from KEYNOTE-006

| Scenario analysis (based on interim data)                                                       | ICUR<br>(\$/QALY)            | % change from<br>base case |
|-------------------------------------------------------------------------------------------------|------------------------------|----------------------------|
| <i>BASE CASE (deterministic)</i>                                                                | \$111,861                    | -                          |
| Best-fitting parametric functions from Wang et al                                               | \$109,715                    | -2%                        |
| Parametric distributions from NICE (all Gompertz)                                               | <i>survival curves cross</i> |                            |
| Average patient weight set equal                                                                | \$101,914                    | -10%                       |
| Proportion of progression-free pembrolizumab patients receiving re-challenge (CADTH: 25%)       | \$107,792                    | -4%                        |
| Proportion of progression-free pembrolizumab patients receiving re-challenge (Robert 2019: 19%) | \$106,731                    | -5%                        |
| Pembrolizumab as treat-to-progression                                                           | \$175,300                    | 36%                        |

Abbreviations: CADTH, Canadian Agency for Drugs and Technologies in Health; ICUR, incremental cost-utility ratio; NICE, National Institute for Health and Care Excellence; QALY, quality-adjusted life-year

B – Scenario analyses based on long-term follow-up data from KEYNOTE-006

| Scenario analysis (based on long-term data)                                                     | ICUR<br>(\$/QALY)            | Percent change<br>from base case |
|-------------------------------------------------------------------------------------------------|------------------------------|----------------------------------|
| <i>BASE CASE (deterministic)</i>                                                                | \$156,829                    | -                                |
| Best-fitting parametric functions from Wang et al                                               | <i>survival curves cross</i> |                                  |
| Parametric distributions from NICE (all Gompertz)                                               | \$157,932                    | 1%                               |
| Average patient weight set equal                                                                | \$147,272                    | -6%                              |
| Proportion of progression-free pembrolizumab patients receiving re-challenge (CADTH: 25%)       | \$146,604                    | -7%                              |
| Proportion of progression-free pembrolizumab patients receiving re-challenge (Robert 2019: 19%) | \$143,936                    | -8%                              |
| Pembrolizumab as treat-to-progression                                                           | \$425,298                    | 171%                             |

Abbreviations: CADTH, Canadian Agency for Drugs and Technologies in Health; ICUR, incremental cost-utility ratio; NICE, National Institute for Health and Care Excellence; QALY, quality-adjusted life-year

**Figure S1.** Deterministic sensitivity analyses

A – One-way sensitivity analyses based on interim data from KEYNOTE-006

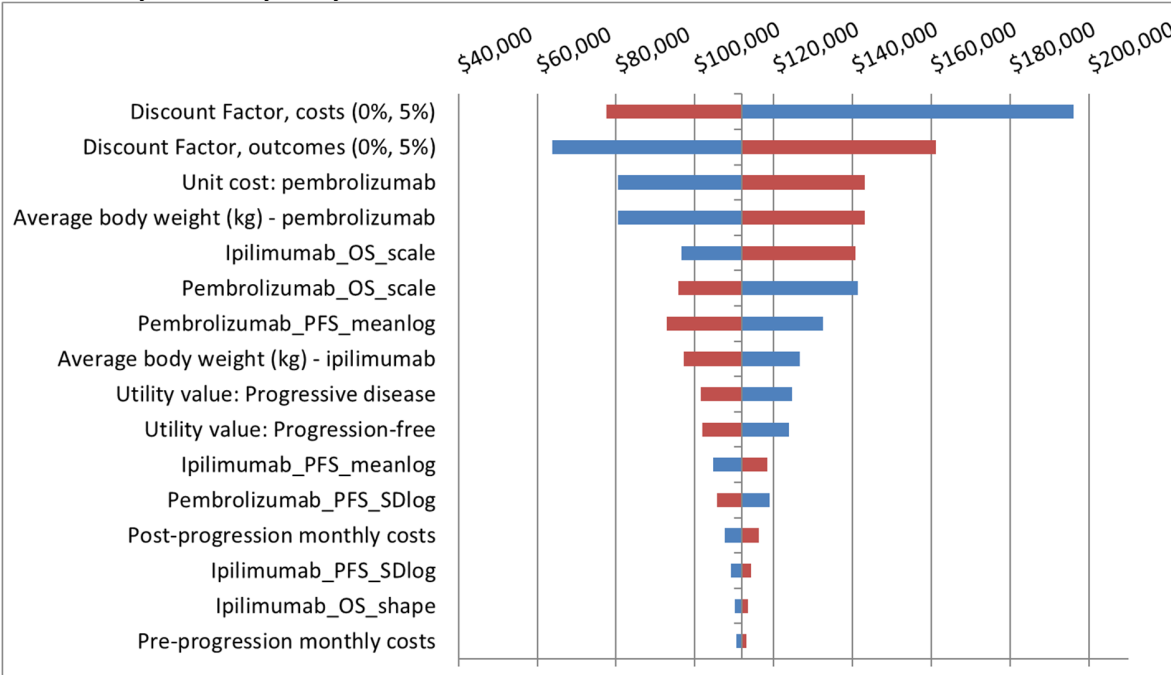

Abbreviations: kg, kilogram; OS, overall survival; PFS, progression-free survival

B – One-way sensitivity analyses based on long-term follow-up data from KEYNOTE-006

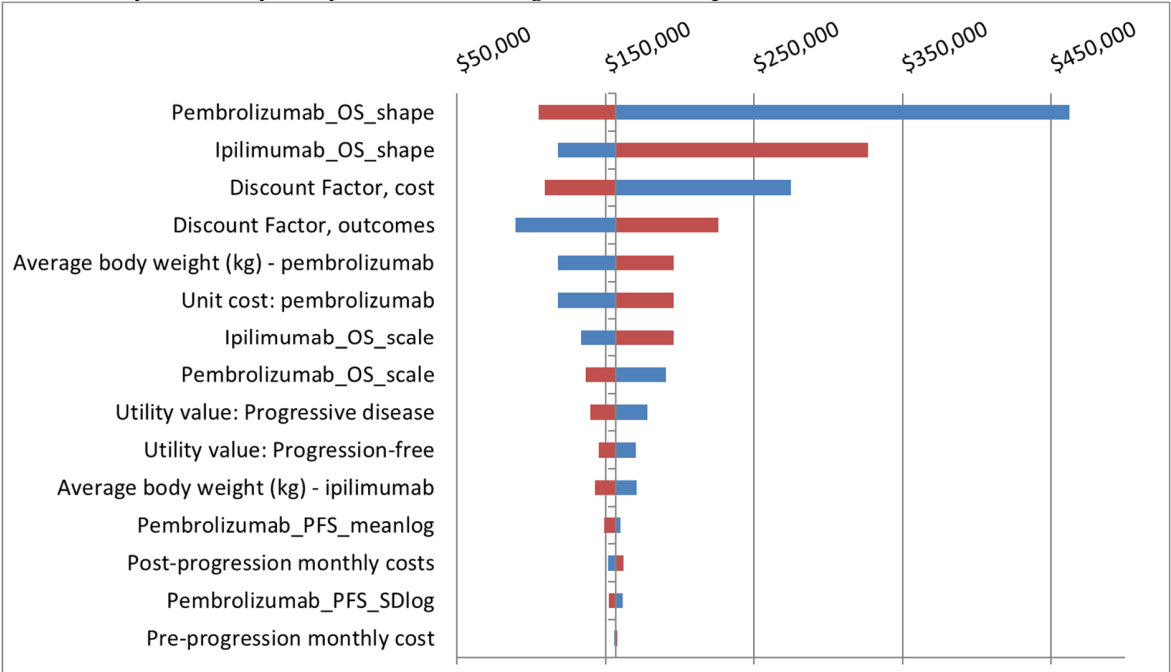

Abbreviations: kg, kilogram; OS, overall survival; PFS, progression-free survival

**Figure S2.** Overall survival based on long-term follow-up data from KEYNOTE-006 and pooled long-term ipilimumab data from Schadendorf et al. 2015

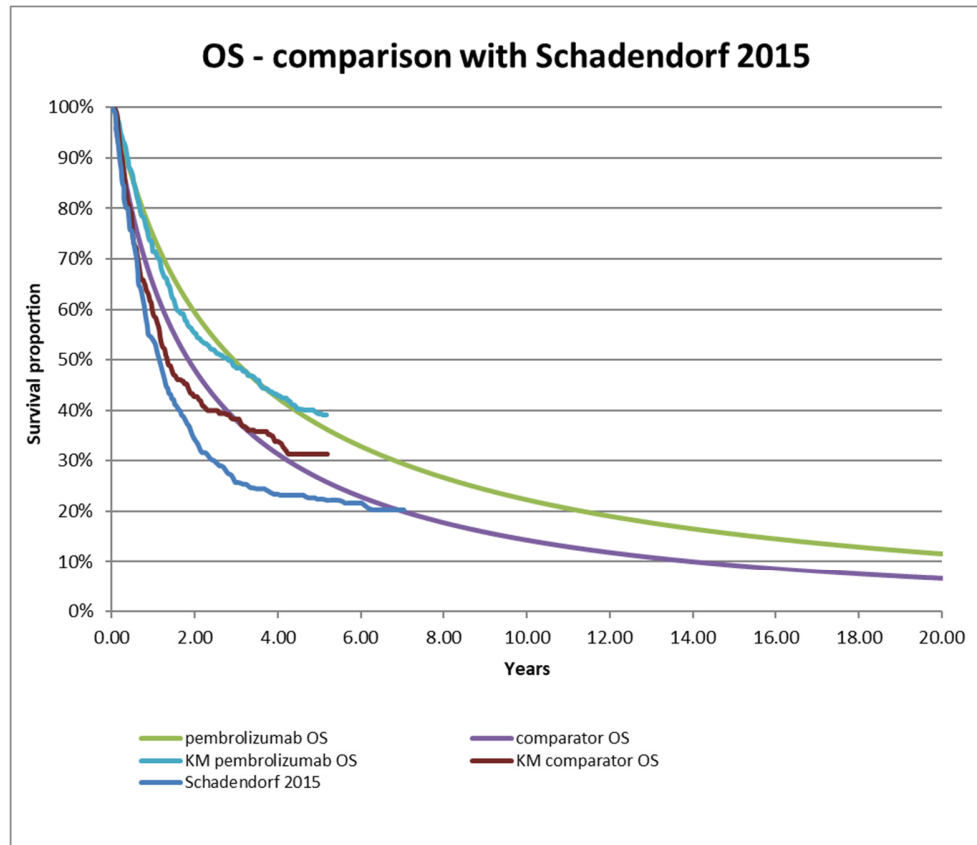

Abbreviations: KM, Kaplan-Meier; OS, overall survival; PFS, progression-free survival
